# Supplementary material for: Sol–gel transcription of novel sugar-based superstructures composed of sugar-integrated gelators into silica: creation of a lotus-shaped silica structure
Source: Royal Society of Chemistry journal article supplement (doi:10.1039/b007218o), 2000-01-01
Supplement: b007218o.doc [file b007218o.doc]

**1** (0.5-5.0 wt%) was dissolved in a medium for sol-gel polymerization: the medium consists of ethanol (100-1000 mg), TEOS (16-32 mg), water (2-6 mg) and benzylamine (2-6 mg) as a catalyst. The sample was sealed in a glass tube and left at ambient temperature for 3-10 days.

To prepare TEM sample b, **1** was dissolved in ethanol, and the solution was gelated ethanol after several minutes. The **1** ethanol gel was taken on Cu grid. Then, 2 wt% OsO4 solution was added on Cu grid which contained the **1** ethanol gel sample. In TEM sample c, **1** and 2 wt% OsO4 were dissolved in ethanol. Then, the **1** ethanol gel fiber which adsorbed OsO4 on the gel surface grew up. The **1** ethanol gel sample was taken on Cu grid. Finally, we observed TEM images of both samples.
